# Supplementary material for: A dual radiolabelling approach for tracking metal complexes: investigating the speciation of copper bis(thiosemicarbazonates) in vitro and in vivo
Source: Royal Society of Chemistry journal article supplement (doi:10.1039/c4mt00330f), 2015-01-01
Supplement: c4mt00330f1.pdf [file c4mt00330f1.pdf]

## A Dual Radiolabelling Approach for Tracking Metal Complexes: Investigating the Speciation of Copper Bis(thiosemicarbazones) in Vitro and in Vivo

Rebekka Huetting,<sup>a,b</sup> Veerle Kersemans,<sup>b</sup> Matthew Tredwell,<sup>a</sup> Bart Cornelissen,<sup>b</sup> Martin Christlieb,<sup>b</sup> Antony D. Gee,<sup>c</sup> Jan Passchier,<sup>d</sup> Sean C. Smart,<sup>b</sup> Véronique Gouverneur,<sup>a</sup> Ruth J. Muschel<sup>b</sup> and Jonathan R. Dilworth<sup>a</sup>

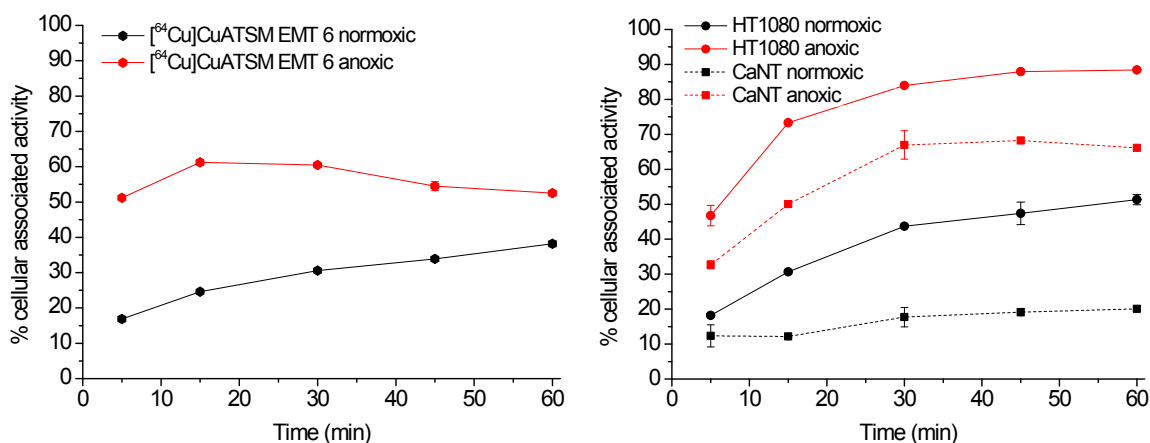

**Figure S1** Percentage cellular associated activity of  $[^{64}\text{Cu}]\text{Cu-ATSM}$  in (left) EMT6 and (right) HT1080 and CaNT cell lines over time, incubated either under normoxic (21%  $\text{O}_2$ , 5%  $\text{CO}_2$ , balance  $\text{N}_2$ ) or anoxic (5%  $\text{CO}_2$ , balance  $\text{N}_2$ ) conditions. Errors (standard deviation) are within symbols if not indicated.

| %ID/g           | $[^{64}\text{Cu}]\text{Cu-ATSM}$ | $[^{64}\text{Cu}]\text{CuL}$ | $[^{123}\text{I}]\text{CuL}$ | $[^{123}\text{I}]\text{H}_2\text{L}$ | $[^{64}\text{Cu}]\text{Cu-acetate}$ |
|-----------------|----------------------------------|------------------------------|------------------------------|--------------------------------------|-------------------------------------|
| Blood           | 0.73±0.05                        | 0.68±0.08                    | 1.1±0.86                     | 1.31±0.05                            | 0.66±0.04                           |
| Tumour          | 1.41±0.10                        | 1.44±0.12                    | 0.69±0.50                    | 0.50±0.05                            | 1.33±0.09                           |
| Muscle          | 0.29±0.07                        | 0.20±0.01                    | 0.30±0.25                    | 0.34±0.00                            | 0.26±0.04                           |
| Stomach         | 5.97±1.49                        | 4.12±0.53                    | 1.40±3.82                    | 1.49±0.59                            | 7.11±6.26                           |
| Small intestine | 9.19±1.18                        | 14.11±0.87                   | 12.23±14.74                  | 0.78±0.03                            | 5.38±0.33                           |
| Large intestine | 3.92±0.47                        | 3.31±0.42                    | 2.38±3.81                    | 0.99±0.30                            | 3.59±0.87                           |
| Fat             | 0.45±0.06                        | 0.42±0.03                    | 0.54±0.61                    | 0.59±0.06                            | 0.36±0.09                           |
| Spleen          | 1.53±0.21                        | 1.25±0.08                    | 3.02±3.60                    | 0.88±0.02                            | 3.03±1.57                           |
| Liver           | 10.03±1.02                       | 7.69±0.81                    | 8.59±7.66                    | 0.83±0.08                            | 8.44±1.07                           |
| Kidneys         | 6.03±0.66                        | 4.55±0.45                    | 3.32±2.90                    | 2.59±0.46                            | 5.01±0.98                           |
| Heart           | 1.28±0.11                        | 0.98±0.10                    | 0.95±0.76                    | 1.01±0.02                            | 0.97±0.09                           |
| Lungs           | 5.49±0.56                        | 5.16±1.13                    | 2.20±1.26                    | 1.43±0.15                            | 5.28±0.62                           |
| Thyroid         | -                                | -                            | 0.57±0.50                    | 0.59±0.02                            | -                                   |
| Ratio T/M       | 5.14±1.30                        | 7.13±0.46                    | 2.27±2.00                    | 1.49±0.14                            | 5.16±0.66                           |

**Table S1.** Biodistribution data (%ID/g ±SD) of  $[^{64}\text{Cu}]\text{Cu-ATSM}$  (n=4),  $[^{64}\text{Cu}]\text{Cu-acetate}$  (n=3),  $[^{64}\text{Cu}]\text{CuL}$  (n=4),  $[^{123}\text{I}]\text{CuL}$  (n=2),  $[^{123}\text{I}]\text{H}_2\text{L}$  (n=2), at 120 min p.i. in female CBA mice bearing CaNT tumours that were anaesthetised with isoflurane/air for 120 min dynamic PET/SPECT imaging sessions.
